# Supplementary material for: Disease course and outcome of 15 monocentrically treated natalizumab-associated progressive multifocal leukoencephalopathy patients
Source: PubMed Central journal article supplement — J Neurol Neurosurg Psychiatry. 2013 Apr 19;84(10):1068–74. doi: 10.1136/jnnp-2013-304897 (PMC3786662; doi:10.1136/jnnp-2013-304897), 2013-04-19
Supplement: jnnp-2013-304897-s1.pdf [file jnnp-2013-304897-s1.pdf]

| Patients                                         | Pat 1 | Pat 2 | Pat 3 | Pat 4 | Pat 5 | Pat 6 | Pat 7 | Pat 8 | Pat 9 | Pat 10 | Pat 11 | Pat 12 | Pat 13 | Pat 14 | Pat 15 |
|--------------------------------------------------|-------|-------|-------|-------|-------|-------|-------|-------|-------|--------|--------|--------|--------|--------|--------|
| <b>Seizures (0=n/1=y)</b>                        | 1     | 0     | 1     | 0     | 1     | 1     | 1     | 0     | 0     | 0      | 1      | 1      | 1      | 0      | 0      |
| ...pre-PML (0=n/1=y)                             | 0     |       | 0     |       | 0     | 0     | 0     |       |       |        | 0      | 0      | 0      |        |        |
| ...in early PML-phase (pre-IRIS-Phase) (0=n/1=y) | 0     |       | 1     |       | 0     | 0     | 0     |       |       |        | 0      | 0      | 0      |        |        |
| ...in IRIS-phase (0=n/1=y)                       | 1     |       |       |       | 1     | 1     | 1     |       |       |        | 1      | 1      | 0      |        |        |
| ... > 12 months post-PML-diagnosis (0=n/1=y)     | 1     |       |       |       | 1     |       | 1     |       |       |        | 0      | 0      | 1      |        |        |
| under anticonvulsive therapy (0=n/1=y)           | 1     |       |       |       | 1     |       | 1     |       |       |        |        |        | 1      |        |        |
| <b>Type of seizures</b>                          |       |       |       |       |       |       |       |       |       |        |        |        |        |        |        |
| focal (0=n/1=y)                                  | 1     |       | 0     |       | 0     | 1     | 0     |       |       |        | 0      | 0      | 1      |        |        |
| complex-focal (0=n/1=y)                          | 0     |       | 1     |       | 0     | 0     | 1     |       |       |        | 0      | 0      | 0      |        |        |
| generalized (0=n/1=y)                            | 1     |       | 1     |       | 1     | 0     | 0     |       |       |        | 1      | 1      | 1      |        |        |
| <b>Anticonvulsive therapy</b>                    |       |       |       |       |       |       |       |       |       |        |        |        |        |        |        |
| Levetiracetam (0=n/1=y)                          | 1     | 1     | 1     | 1     | 1     | 1     | 1     | 0     | 0     | 1      | 1      | 1      | 1      | 1      | 1      |
| Lamotrigine (0=n/y=1)                            | 1     | 0     | 1     | 0     | 0     | 0     | 0     | 0     | 0     | 0      | 0      | 0      | 0      | 0      | 0      |
| Lacosamide (0=n/1=y)                             | 0     | 0     | 0     | 0     | 1     | 1     | 0     | 0     | 0     | 0      | 0      | 0      | 0      | 0      | 0      |
| Topiramate (0=n/1=y)                             | 0     | 1     | 0     | 0     | 0     | 0     | 0     | 0     | 0     | 0      | 1      | 0      | 0      | 0      | 0      |
| Phenytoin (0=n/1=y)                              | 0     | 0     | 0     | 0     | 1     | 0     | 0     | 0     | 0     | 0      | 1      | 0      | 0      | 0      | 0      |

n=no; y=yes

**Supplemental table 1 – Seizures in PML patients**

| Patients                                                                      | Pat 1 | Pat 2 | Pat 3 | Pat 4 | Pat 5 | Pat 6 | Pat 7 | Pat 8 | Pat 9 | Pat 10 | Pat 11 | Pat 12 | Pat 13 | Pat 14 | Pat 15 |
|-------------------------------------------------------------------------------|-------|-------|-------|-------|-------|-------|-------|-------|-------|--------|--------|--------|--------|--------|--------|
| <b>Clinical relapses post-PML</b>                                             |       |       |       |       |       |       |       |       |       |        |        |        |        |        |        |
| ...(in the year) pre-natalizumab therapy (n)                                  | 2     | 2     | 2     | 1     | 3     | 2     | 2     | 2     | 3     | 1      | 2      | 2      | 1      | 2      | 2      |
| ...under natalizumab therapy (n)                                              | 1     | 1     | 0     | 0     | 0     | 0     | 1     | 1     | 0     | 0      | 0      | 0      | 0      | 0      | 0      |
| ...1-3 months post-PML-diagnosis (n)                                          | 0     | 0     | 0     | 0     | 0     | 0     | 0     | 0     | 0     | 0      | 0      | 0      | 0      | 0      | 0      |
| ...4-6 months post-PML-diagnosis (n)                                          | 0     | 1     |       | 0     | 0     |       | 1     | 0     | 0     | 0      | 0      | 0      | 0      | 0      | 0      |
| ...7-12 months post-PML-diagnosis (n)                                         | 0     |       |       | 0     | 0     |       | 1     | 0     | 0     | 0      | 0      | 0      | 0      | 0      | 0      |
| ...13-24 months post-PML-diagnosis (n)                                        | 0     |       |       |       | 0     |       | 0     | 0     | 0     | 0      | 0      | 0      | 0      | 0      | 0      |
| ...25-36 months post-PML-diagnosis (n)                                        | 0     |       |       |       |       |       | 0     | 0     |       |        |        | 1      |        |        |        |
| ...≥37 months post-PML-diagnosis (n)                                          |       |       |       |       |       |       |       | 0     |       |        |        |        |        |        |        |
| <b>Paraclinical MS-activity post-PML</b>                                      |       |       |       |       |       |       |       |       |       |        |        |        |        |        |        |
| <b>Contrast enhancing MS lesions</b>                                          |       |       |       |       |       |       |       |       |       |        |        |        |        |        |        |
| ...< 1 months post-PML-diagnosis (0=n/1=y/3=no MRI)                           | 0     | 0     | 0     | 0     | 1     | 0     | 0     | 0     | 0     | 0      | 0      | 0      | 0      | 0      | 0      |
| ...1-3 months post-PML-diagnosis (0=n/1=y, 3=no MRI)                          | 0     | 1     | 0     | 0     | 1     | 0     | 0     | 0     | 0     | 0      | 0      | 0      | 0      | 0      | 0      |
| ...4-6 months post-PML-diagnosis (0=n/1=y/3=no MRI)                           | 0     | 1     |       | 3     | 3     |       | 1     | 3     | 0     | 1      | 1      | 0      | 3      | 0      | 3      |
| ...7-12 months post-PML-diagnosis (0=n/1=y/3=no MRI)                          | 0     |       |       | 0     | 3     |       | 0     | 3     | 3     | 0      | 0      | 3      | 3      | 0      | 1      |
| ...13-24 months post-PML-diagnosis (0=n/1=y/3=no MRI)                         | 0     |       |       |       | 3     |       | 0     | 1     | 3     | 0      |        | 3      | 0      | 1      |        |
| ...25-36 months post-PML-diagnosis (0=n/1=y/3=no MRI)                         | 0     |       |       |       |       |       | 0     | 0     |       |        |        |        |        |        |        |
| ...≥ 37 months post-PML-diagnosis (0=n/1=y/3=no MRI)                          |       |       |       |       |       |       |       | 1     |       |        |        |        |        |        |        |
| <b>Progression of T2-lesions</b>                                              |       |       |       |       |       |       |       |       |       |        |        |        |        |        |        |
| ...< 1 months post-PML-diagnosis (0=n/1=y/3=no MRI)                           | 0     | 0     | 0     | 0     | 0     | 0     | 0     | 0     | 0     | 0      | 0      | 0      | 0      | 0      | 0      |
| ...1-3 months post-PML-diagnosis (0=n/1=y/3=no MRI)                           | 0     | 0     | 0     | 0     | 0     | 0     | 0     | 0     | 0     | 0      | 0      | 0      | 0      | 0      | 0      |
| ...4-6 months post-PML-diagnosis (0=n/1=y/3=no MRI)                           | 0     | 1     |       | 3     | 3     |       | 0     | 3     | 0     | 0      | 0      | 0      | 3      | 0      | 3      |
| ...7-12 months post-PML (0=n/1=y/3=no MRI)                                    | 0     |       |       | 0     | 3     |       | 0     | 3     | 3     | 0      | 0      | 3      | 3      | 0      | 0      |
| ...13-24 months post-PML-diagnosis (0=n/1=y/3=no MRI)                         | 0     |       |       |       | 3     |       | 0     | 1     | 3     | 0      |        | 3      | 0      | 1      |        |
| ...25-36 months post-PML-diagnosis (0=n/1=y/3=no MRI)                         | 0     |       |       |       |       |       | 0     | 0     |       |        |        |        |        |        |        |
| ...≥ 37 months post-PML-diagnosis (0=n/1=y/3=no MRI)                          |       |       |       |       |       |       |       | 1     |       |        |        |        |        |        |        |
| <b>Time period until first clinical relapse post-PML (in months)</b>          | 23    | 4     |       |       |       |       | 4     |       |       |        |        | 31     |        |        |        |
| <b>Time period until GD enhancement MS lesions on MRI post-PML (in weeks)</b> |       | 7     |       |       | 3     |       | 21    | 87    |       | 17     |        |        |        | 91     | 36     |
| <b>Time period until progression of T2-lesions on MRI post-PML (in weeks)</b> |       | 17    |       |       |       |       |       | 87    |       |        |        |        |        | 91     |        |

**Supplemental table 2 – MS activity post-PML**

| Patients                                                     | Pat 1 | Pat 2 | Pat 3 | Pat 4 | Pat 5 | Pat 6 | Pat 7 | Pat 8 | Pat 9 | Pat 10 | Pat 11 | Pat 12 | Pat 13 | Pat 14 | Pat 15 |
|--------------------------------------------------------------|-------|-------|-------|-------|-------|-------|-------|-------|-------|--------|--------|--------|--------|--------|--------|
| Restart of MS therapy post-PML (0=n or not yet/1=y)          | 1     | 1     | 0     | 1     | 0     | 0     | 1     | 1     | 0     | 1      | 1      | 1      | 0      | 1      | 1      |
| Time period until restart of MS therapy post-PML (in months) | 5     | 4     |       | 3     |       |       | 16    | 18    |       | 9      | 9      | 5      |        | 15     | 9      |
| <b>MS-Therapie post-PML</b>                                  |       |       |       |       |       |       |       |       |       |        |        |        |        |        |        |
| Glatiramer acetate (0=n/1=y)                                 | 1     | 0     |       | 1     |       |       | 1     | 0     |       | 1      | 1      | 1      |        | 0      | 1      |
| Fingolimod (0=n/1=y)                                         | 1     | 0     |       | 0     |       |       | 0     | 0     |       | 0      | 0      | 0      |        | 1      | 0      |
| Interferonβ-1a (0=n/1=y)                                     | 0     | 1     |       | 0     |       |       | 0     | 0     |       | 0      | 0      | 0      |        | 0      | 0      |
| Immunglobulines (0=n/1=y)                                    | 0     | 0     |       | 0     |       |       | 0     | 1     |       | 0      | 0      | 0      |        | 0      | 0      |

n=no; y=yes

**Supplemental table 3 – MS treatment post PML**
